# Supplementary material for: Recent accelerated diversification in rosids occurred outside the tropics
Source: PubMed Central journal article supplement (PMC7335165; doi:10.1038/s41467-020-17116-5), 2020-07-03
Supplement: 41467_2020_17116_MOESM1_ESM.pdf [file 41467_2020_17116_MOESM1_ESM.pdf]

**Sun *et al.* (2020) Recent accelerated diversification in rosids occurred outside the tropics**

Supplementary Information:

Supplementary Method: 1-5

Supplementary Table: 1-7

Supplementary Figure: 1-3

Supplementary References

## Supplementary Methods

### Supplementary Method 1: Species distribution data assembly and temperature data layers

#### 1) *Assembling and cleaning coordinates*

We queried all 19,740 name validated rosid species sampled in our tree from iDigBio and GBIF using R packages `rgbif` v1.3.0<sup>1,2</sup> and `ridigbio` v0.3.5<sup>3</sup> on June 4th, 2019. During our initial query and data assembly steps, we only extracted geo-referenced data and excluded any coordinates with zero latitude and longitude. For each individual species, we used a custom R script to calculate the geographic centroid and the Euclidean distance from each species occurrence to this centroid, removing any geographic outliers beyond three standard deviations distant. We did not impose a minimum occurrence record limit in order to maximize species representation.

#### 2) *BioClim mean annual temperature layer*

We downloaded a global mean annual temperature dataset (bio1 from BioClim), a dataset representing temperatures from 1970 to 2000, averaged monthly at 30-second spatial resolution ( $\sim 1 \text{ km}^2$ ) from the WorldClim website. We used a Python script from Folk et al.<sup>4</sup> to extract temperature from each locality record, excluding any points with missing data. We then calculated a species mean temperature, which was used in downstream phylogenetic comparative analyses.

#### 3) *Score the binary geographic and climatic tropicality datasets*

##### **Geographic tropicality dataset**

For each species, we calculated the mean latitude of geo-referenced locality records and classified the species as tropical if this value fell between the Tropics of Cancer and Capricorn ( $23.43677^\circ\text{N}$  and  $23.43677^\circ\text{S}$ ), and non-tropical (i.e. temperate + polar) if it fell outside this interval.

##### **Climatic tropicality dataset**

The climatic tropicality dataset used the Köppen-Geiger climatic tropics definition as previously calculated by Owens et al.<sup>5</sup> (that is, defining as tropical those regions with year-round monthly mean temperatures of  $> 18^\circ\text{C}$ ). As with mean annual temperature, we used Python script<sup>4</sup> to associate locality data with global tropicality classifications. We then calculated the mode for each species (i.e., the most prevalent tropicality

classification; thus species with >50% occurrences outside tropical sites were classified as non-tropical).

### **Supplementary Method 2: Diversification analyses implemented by BAMM & DR**

We conducted diversification analyses across rosid lineages using BAMM v2.5.0<sup>6</sup>. BAMM is able to account for non-random and incomplete sampling, allowing the user to assign tips to clades (e.g., orders and families in our case) and indicate the total proportion of the clade sampled within the phylogeny. Analyzing the entire 5-locus, 19,740-taxon rosid phylogeny would require excessive computational resources for BAMM to reach MCMC convergence. To deal with potential convergence issues, we conducted independent analyses of 17 subtrees representing recognized orders recovered in the 5-locus tree.

In most cases, four independent MCMC chains of 20,000,000 generations were run and those running priors were estimated using the R package BAMMtools v2.1.6<sup>7</sup> with the “setBAMMpriors” function. For larger rosid subclades, the number of generations in MCMC chains, the number of expected shifts (expectedNumberOfShifts = 10, if tips > 5000) and rate priors were manually adjusted to ensure MCMC convergence (see Supplementary Table 1). Parameter effective sample sizes (>200 for both the number of shifts and log likelihoods) and convergence among chains were assessed in the R package coda v0.19-1<sup>8</sup>. After removing 10% of the trees as burn-in, we explored the BAMM output using BAMMtools.

As an alternative to BAMM for investigating speciation rate dynamics and rate-trait correlation patterns, we employed the DR statistic<sup>9</sup>, one of the most widely used semiparametric approaches to diversification estimation<sup>9,10,11,12</sup>. The DR statistic quantifies the “splitting rate” from each extant species to the tree root as a “likelihood-free” estimate of diversification rate. Methods followed those described in Jetz et al.<sup>9</sup> and Harvey et al.<sup>10</sup>. Due to its more rapid computation, the DR statistic enabled us to estimate rates from the whole rosid tree and as well as 17 rosid ordinal clades for es-SIM tests<sup>13</sup> on continuous mean annual temperature data and for FiSSE tests<sup>14</sup> on categorical tropicality data. Since it was impossible for BAMM to achieve convergence in the global 20k-tip rosid tree, STRAPP tests were performed only for subclades. To further explore tips rates in global pattern, we conducted the spatial diversification patterns analyses using R package dggridR v. 2.0.3<sup>15</sup>.

Lastly to account for recent criticism relating to the statistical methods for lineage-

specific diversification models and diversification rate estimation<sup>16,17,18,19</sup>, which advocated for problematic behavior of BAMM under certain conditions, we compared BAMM results with other diversification analyses implemented with RPANDA and the DR statistic, and used the most updated version of BAMM and BAMMtools<sup>20</sup>, considering the author’s response notes<sup>21,22</sup>.

### **Supplementary Method 3: Hidden-state speciation and extinction (HiSSE) models**

We implemented binary state speciation and extinction (BiSSE<sup>23</sup>) and hidden state speciation and extinction (HiSSE<sup>24</sup>) models, executed in R packages HiSSE v1.9.6<sup>24</sup>.

We used the following labeling conventions: non-tropical state = 0; tropical state = 1, hidden character states = A (absent), B (present). Hence the full states of the model are 0A, 1A, 0B, 1B. A standard BiSSE model does not include a hidden state; this was implemented by disallowing transitions to the hidden states 0B or 1B. The HiSSE function “TransMatMaker” takes “turnover.anc” and “eps.anc” as arguments. These arguments control the number of rate classes for the HiSSE model. The order of classes in these arguments corresponds to 0A, 1A, 0B, 1B; distinct states are given by successive non-zero integers while 0 removes a parameter.

We compared the fit of four different models: (one BiSSE-like model, one BiSSE-like null model, one HiSSE full model, and one HiSSE 2-state null model): (1A) a full BiSSE model (here, “BiSSE\_full”) with two observed states and no hidden state, and constrained equal extinction ( $\mu_0 = \mu_1$ ) and transitions ( $q_{01} = q_{10}$ ) associated with each state; (2A) a BiSSE-like null model (here “BiSSE\_null”) with two observed states and no hidden states, constrained speciation and extinction rates ( $\lambda_0 = \lambda_1$ ,  $\mu_0 = \mu_1$ ). We then ran two HiSSE models: (1B) “HiSSE\_full” model with two hidden states (A, B) contained within each observed state (i.e., states 0A, 1A, 0B, 1B), turnover rate vary freely for 4 states (no constraint); (2B) “HiSSE\_cid2\_null” model, i.e., the 2-state character independent diversification model (also called CID-2); we use this as our null model by forcing the two observed states (non-tropical or tropical) to have the same net turnover rates, while permitting the hidden states to vary freely. All four models were implemented in R package HiSSE V.1.9.6<sup>24</sup>, and the rest parameters were the default in the HiSSE package. Comparisons were conducted for both tropicity traits on the large-scale rosid phylogeny. The best model is evaluated based on  $\Delta$ AIC and Akaike weights (AW)<sup>25</sup>. All models are described in Supplementary Table 4.

#### **Supplementary Method 4:** Sensitivity test of uneven occurrence data between tropical and non-tropical species

Bias in patterns of incomplete sampling, especially for tropical species, are well known in existing occurrence record repositories. Limited work has been done to date assessing the impact of these biases on diversification or on questions specifically relevant to tropicality such as those we pose here. We assessed the impact of this potential bias with two approaches. First, we plot all the sampled rosid occurrence data on a equal-area global grid with cells approximately 322 km (ca. 200 miles) across and counted number of species within those cells using R package `dggridR` v. 2.0.3<sup>15</sup> to display overall global richness patterns for rosids based on current sampling (Supplementary Fig. 1). Our overall expectation (see Kreft & Jetz<sup>26</sup>, who considered all vascular plants), is that, rosid diversity in non-tropical areas should be lower than in equatorial regions. The map (Supplementary Fig. 1) approximately demonstrates expected richness patterns but with over-representation of species in North America and Western Europe.

Given evidence for over-representation in some non-tropical areas, we implemented a sensitivity analysis, simulating datasets where that bias is reduced or potentially even inverted. We achieved this by randomly dropping 10%, 30%, or 50% of non-tropical species from the tips of each ordinal subtree, while retaining all tropical species. In the case of the 50% drop of non-tropical species, tropical species outnumber temperate ones for most clades, simulating over-representation of tropical species. We used “`getTipRates`” function in `BAMMtools`<sup>7</sup> to get tip rates from each ordinal subtree at both before and after each of dropping-taxon treatment; then reran STRAPP procedure<sup>27</sup> as implemented in `BAMMtools`<sup>7</sup> as also mentioned in the main text; and lastly we assessed the impact on estimated tip rates and downstream phylogenetic regressions. The results of this analyses are summarized in Supplementary Table 7. We find that (1) diversification rate results are very robust to removal of non-tropical species, suggesting that biases in number of species included from different regions do not impact the main findings here; and that (2) overall reduction in species sampling also does not have a dramatic impact on assessment of rates. While inclusion of more species is clearly critical for producing the highest quality phylogenetic framework for downstream analysis<sup>12</sup>, the tip diversification rate assessment is robust to species sampling issues. This result makes intuitive sense because (1) we used phylogenetic methods that derive diversification estimates from branch length information as well as species count data, and (2) most methods implemented have clade-specific corrections

for missing species, reducing the impact of biased sampling effort.

### Supplementary Method 5: Diversification analyses implemented by RPANDA

We used RPANDA v1.4<sup>28</sup> to fit a series of time- and temperature-dependent likelihood diversification birth-death models<sup>28,29</sup> for the time-calibrated 5-locus rosid tree whose details can be found in Sun et al.<sup>30</sup>. In total, we tested 18 likelihood-based diversification models (also see Sun et al.<sup>12</sup>):

#### Nine time-dependent models

- 1) Pure birth model, no extinction rate ( $\mu$ ,  $\mu = 0$ ), and constant speciation rate ( $\lambda$ , hereafter bcst.d0.t)

*# t is time*

*# y is a vector of initial values feeding to the functions of  $\lambda$  and  $\mu$*

*f.lamb = function(t, y){y[1]}*

*f.mu = function(t, y){0}*

- 2) Birth-death model with constant speciation and extinction (here as bcst.dcst.t)

*f.lamb = function(t, y){y[1]}*

*f.mu = function(t, y){y[1]}*

- 3) Pure birth model with exponential variation in speciation rate (here as bvar.d0.t)

*f.lamb = function(t, y){y[1]\*exp(y[2]\*t)}*

*f.mu = function(t, y){0}*

- 4) Pure birth model with linear variation in speciation rate (here as bvar.l.d0.t)

*f.lamb = function(t, y){y[1] + y[2]\*t}*

*f.mu = function(t, y){0}*

- 5) Birth-death model with exponential variation in speciation rate and constant extinction (here as bvar.dcst.t)

*f.lamb = function(t, y){y[1]\*exp(y[2]\*t)}*

*f.mu = function(t, y){y[1]}*

- 6) Birth-death model with linear variation in speciation rate and constant extinction (here as bvar.l.dcst.t)

*f.lamb = function(t, y){y[1] + y[2]\*t}*

*f.mu = function(t, y){y[1]}*

- 7) Birth-death model with a constant speciation rate and exponential variation in extinction (here as bcst.dvar.t)

$$f.lamb = function(t, y)\{y[1]\}$$

$$f.mu = function(t,y)\{y[1]*exp(y[2]*t)\}$$

- 8) Birth-death model with a constant speciation rate and linear variation in extinction (here as bcst.dvar.l.t)

$$f.lamb = function(t, y)\{y[1]\}$$

$$f.mu = function(t,y)\{y[1] + y[2]*t\}$$

- 9) Birth-death model with exponential variation in speciation and extinction (here as bvar.dvar.t)

$$f.lamb = function(t, y)\{y[1]*exp(y[2]*t)\}$$

$$f.mu = function(t,y)\{y[1]*exp(y[2]*t)\}$$

### **Nine temperature-dependent models**

We also tested nine environmental-dependent diversification models inferred from oxygen isotopes ( $\delta^{18}\text{O}$ ) covering major changes of global temperature since the Late Cretaceous (~ 113 Myr to present)<sup>31,32</sup>.

- 10) No extinction rate ( $\mu, \mu = 0$ ), and constant speciation rate with temperature ( $x$ ) ( $\lambda$ ,  $\lambda$ ; hereafter bcst.d0.x)

#  $t$  is time  
 #  $x$  is temperature  
 #  $y$  is a vector of initial values feeding to the functions of  $\lambda$  and  $\mu$

$$f.lamb = function(t,x,y)\{y[1]*x\}$$

$$f.mu = function(t,x,y)\{0\}$$

- 11) Constant speciation and extinction with temperature ( $x$ ) (here as bcst.dcst.x)

$$f.lamb = function(t,x,y)\{y[1]*x\}$$

$$f.mu = function(t,x,y)\{y[1]*x\}$$

- 12) Exponential variation in speciation rate with temperature ( $x$ ) (here as bvar.d0.x)

$$f.lamb = function(t,x,y)\{y[1]*exp(y[2]*x)\}$$

$$f.mu = function(t,x,y)\{0\}$$

- 13) Linear variation in speciation rate with temperature ( $x$ ) (here as bvar.l.d0.x)

$$f.lamb = function(t,x,y)\{y[1] + y[2]*x\}$$

$$f.mu = function(t,x,y)\{0\}$$

- 14) Exponential variation in speciation rate with temperature ( $x$ ) and constant extinction with temperature ( $x$ ) (here as `bvar.dvst.x`)

$$f.lamb = function(t,x,y)\{y[1]*exp(y[2]*x)\}$$

$$f.mu = function(t,x,y)\{y[1]*x\}$$

- 15) Linear variation in speciation rate with temperature ( $x$ ) and constant extinction with temperature ( $x$ ) (here as `bvar.l.dvst.x`)

$$f.lamb = function(t,x,y)\{y[1] + y[2]*x\}$$

$$f.mu = function(t,y)\{y[1]\}$$

- 16) Constant speciation rate with temperature ( $x$ ) and exponential variation in extinction with temperature ( $x$ ) (here as `bcst.dvar.x`)

$$f.lamb = function(t,x,y)\{y[1]*x\}$$

$$f.mu = function(t,x,y)\{y[1]*exp(y[2]*x)\}$$

- 17) Constant speciation rate with temperature ( $x$ ) and linear variation in extinction with temperature ( $x$ ) (here as `bcst.dvar.l.x`)

$$f.lamb = function(t,x,y)\{y[1]*x\}$$

$$f.mu = function(t,x,y)\{y[1] + y[2]*x\}$$

- 18) Exponential variation both in speciation and extinction rates with temperature ( $x$ ) (here as `bvar.dvar.x`)

$$f.lamb = function(t,x,y)\{y[1]*exp(y[2]*x)\}$$

$$f.mu = function(t,x,y)\{y[1]*exp(y[2]*x)\}$$

The first nine birth-death models were calculated using the function “`fit_bd`”<sup>28</sup>, and the rest models were calculated with the function “`fit_env`”. We compared the likelihood supports, the Akaike Information Criterion (AIC)<sup>33</sup> and AW<sup>25</sup> for the 18 different models<sup>29</sup>; the model with the smallest AIC value and largest AW was chosen as the best diversification model.

## Supplementary Tables

**Supplementary Table 1.** Summary table for 17 rosid orders, giving species richness, occurrence records, and summaries of temperature data layers.

| Order                | Richness       | Occ. recs.       | Ann. Tm. recs  | Köpp. recs.      | Köp           |               | Geo           |               |
|----------------------|----------------|------------------|----------------|------------------|---------------|---------------|---------------|---------------|
|                      |                |                  |                |                  | Non-trop.%    | Trop.%        | Non-trop.%    | Trop.%        |
| Brassicales          | 5,940          | 215,259          | 63,136         | 122,654          | 91.50%        | 8.50%         | 82.03%        | 17.97%        |
| Celastrales          | 1,499          | 32,479           | 9,715          | 18,538           | 67.33%        | 32.67%        | 52.12%        | 47.88%        |
| Crossosomatales      | 82             | 4,709            | 1,589          | 2,891            | 95.83%        | 4.17%         | 75.00%        | 25.00%        |
| Cucurbitales         | 3,094          | 57,686           | 18,314         | 33,428           | 50.21%        | 49.79%        | 23.08%        | 76.92%        |
| Fabales              | 24,191         | 788,889          | 221,934        | 428,365          | 66.95%        | 33.05%        | 54.76%        | 45.24%        |
| Fagales              | 2,263          | 121,488          | 33,110         | 64,770           | 86.19%        | 13.81%        | 75.73%        | 24.27%        |
| Geraniales           | 962            | 36,961           | 11,419         | 21,042           | 99.66%        | 0.34%         | 87.29%        | 12.71%        |
| Huerteales           | 30             | 767              | 186            | 392              | 71.43%        | 28.57%        | 71.43%        | 28.57%        |
| Malpighiales         | 21,316         | 449,108          | 129,486        | 251,102          | 47.24%        | 52.76%        | 32.79%        | 67.21%        |
| Malvales             | 7,771          | 154,303          | 44,164         | 83,855           | 58.20%        | 41.80%        | 44.40%        | 55.60%        |
| Myrtales             | 15,529         | 213,248          | 58,629         | 109,399          | 58.38%        | 41.62%        | 41.13%        | 58.87%        |
| Oxalidales           | 2,207          | 22,340           | 6,734          | 11,715           | 78.77%        | 21.23%        | 51.35%        | 48.65%        |
| Picramniales         | 57             | 1,846            | 513            | 886              | 20.00%        | 80.00%        | 0             | 100.00%       |
| Rosales              | 20,620         | 334,620          | 94,921         | 189,341          | 86.72%        | 13.28%        | 76.36%        | 23.64%        |
| Sapindales           | 7,421          | 224,749          | 58,500         | 111,166          | 49.30%        | 50.70%        | 36.28%        | 63.72%        |
| Zygophyllales        | 340            | 11,147           | 3,112          | 5,909            | 78.33%        | 21.67%        | 58.33%        | 41.67%        |
| Vitales              | 1,155          | 21,500           | 6,581          | 12,818           | 47.27%        | 52.73%        | 38.18%        | 61.82%        |
| <b>Total summary</b> | <b>114,477</b> | <b>2,691,099</b> | <b>762,043</b> | <b>1,468,271</b> | <b>65.07%</b> | <b>34.93%</b> | <b>51.45%</b> | <b>48.55%</b> |

Notes:

For the different temperature datasets, the numbers of unique records are dependent on each of the data layer resolution.

Richness: Species richness as estimated from OpenTree (cf. Ref.<sup>30</sup>)

Ann. Tm. recs: records of mean annual temperature (bio1 from WorldClim) for each order

Occ. recs.: occurrence records obtained from iDigBio and GBIF.

Köpp. recs.: Records successfully associated with Köppen-Geiger climatic data. Geographic tropicality is not given because this was successfully associated with all records.

Non-trop.% and Trop.%: percentage of non-tropical and tropical rosid species based on climatic (Köp.) and geographic (Geo.) binary tropicality definitions, respectively (see also Fig. 3).

**Supplementary Table 2.** Lambda transform and likelihood ratio tests (one-tailed test) for the presence of phylogenetic niche conservatism in the three contemporary temperature niche datasets.

| <b>Traits</b>           | <b>Pagel's <math>\lambda</math> test of phylogenetic signal</b> |                                |                       |                             |
|-------------------------|-----------------------------------------------------------------|--------------------------------|-----------------------|-----------------------------|
|                         | <i>Null Hypothesis</i>                                          | <i>Alternative Hypothesis</i>  |                       |                             |
|                         | <b>logL<sub>non-tropical</sub></b>                              | <b>logL<sub>tropical</sub></b> | <b><i>p</i>-value</b> | <b><math>\lambda</math></b> |
| Mean annual temperature | -95722.06                                                       | -85674.52                      | <b>0</b>              | 0.862086                    |
| Köppen tropicality      | -7713.990061                                                    | -7156.118049                   | <b>1.25E-244</b>      | 0.9562965                   |
| Geographic tropicality  | -7386.139644                                                    | -6686.356871                   | <b>2.61E-306</b>      | 0.9381459                   |

**Supplementary Table 3.** Summary table of parametric testing analyses for correlation between speciation rate and temperature and between tropicality traits using STRAPP.

| Order           | MAT             |           | Köp             |           | Geo             |           |
|-----------------|-----------------|-----------|-----------------|-----------|-----------------|-----------|
|                 | <i>p</i> -value | pv.adjust | <i>p</i> -value | pv.adjust | <i>p</i> -value | pv.adjust |
| Brassicales     | 0.027           | 0.432     | 0.127           | 0.999     | 0.482           | 0.999     |
| Celastrales     | 0.723           | 0.999     | 0.674           | 0.999     | 0.724           | 0.999     |
| Crossosomatales | 0.975           | 0.999     | 0.985           | 0.999     | 0.978           | 0.999     |
| Cucurbitales    | 0.679           | 0.999     | 0.229           | 0.999     | 0.392           | 0.999     |
| Fabales         | 0.005           | 0.085     | <b>0</b>        | <b>0</b>  | 0.01            | 0.160     |
| Fagales         | 0.239           | 0.999     | 0.311           | 0.999     | 0.433           | 0.999     |
| Geraniales      | 0.893           | 0.999     | 0.958           | 0.999     | 0.918           | 0.999     |
| Huerteales      | 0.997           | 0.999     | 0.999           | 0.999     | 0.996           | 0.999     |
| Malpighiales    | 0.051           | 0.765     | 0.08            | 0.999     | 0.156           | 0.999     |
| Malvales        | 0.643           | 0.999     | 0.593           | 0.999     | 0.856           | 0.999     |
| Myrtales        | 0.359           | 0.999     | 0.559           | 0.999     | 0.63            | 0.999     |
| Oxalidales      | 0.995           | 0.999     | 0.998           | 0.999     | 0.999           | 0.999     |
| Picramniales    | 0.994           | 0.999     | 0.995           | 0.999     | NA              | NA        |
| Rosales         | 0.376           | 0.999     | 0.413           | 0.999     | 0.589           | 0.999     |
| Sapindales      | 0.233           | 0.999     | 0.249           | 0.999     | 0.321           | 0.999     |
| Vitales         | 0.969           | 0.999     | 0.979           | 0.999     | 0.976           | 0.999     |
| Zygophyllales   | 0.999           | 0.999     | 0.999           | 0.999     | 0.999           | 0.999     |

Notes:

MAT: continuous mean annual temperature

Two tropicality traits: Köppen-Geiger climatic(Köp) and geographic (Geo)

*p*-value is for correlation between speciation rate and MAT, Köp and Geo datasets, respectively; the significant *p*-values are in bold;

pv.adjust refers to adjusting the corresponding *p*-value for family-wise error using the method from ref.<sup>34</sup>

For Picramniales, all species were scored as tropical, hence the binary-trait test in STRAPP is not applicable and this order is marked “NA”

**Table S4.** HiSSE modules fitted for investigating correlation of rosid diversification and climatic and geographic tropicality temperature traits.

| Traits | Model             | Hidden States | net turnover rate | extinction fraction | transition rates | Loglik              | AIC                | AW        | $\Delta$ AIC | np       |
|--------|-------------------|---------------|-------------------|---------------------|------------------|---------------------|--------------------|-----------|--------------|----------|
| Köp    | BiSSE_full        | FALSE         | vary              | equal               | equal            | -60254.91553        | 120517.8311        | 0         | 5219.6499    | 4        |
|        | BiSSE_null        | FALSE         | equal             | equal               | equal            | -60255.67164        | 120517.3433        | 0         | 5219.1621    | 3        |
|        | <b>HiSSE_full</b> | <b>TRUE</b>   | <b>vary</b>       | <b>equal</b>        | <b>equal</b>     | <b>-57643.0906</b>  | <b>115298.1812</b> | <b>1</b>  | <b>0</b>     | <b>6</b> |
|        | HiSSE_cid2_null   | TRUE          | equal             | equal               | equal            | -58642.94677        | 117293.8935        | 0         | 1995.7123    | 4        |
| Geo    | BiSSE_full        | FALSE         | vary              | equal               | equal            | -61692.79466        | 123393.5893        | 0         | 5094.4474    | 4        |
|        | BiSSE_null        | FALSE         | equal             | equal               | equal            | -61886.74018        | 123779.4804        | 0         | 5480.3385    | 3        |
|        | <b>HiSSE_full</b> | <b>TRUE</b>   | <b>vary</b>       | <b>equal</b>        | <b>equal</b>     | <b>-59143.57097</b> | <b>118299.1419</b> | <b>1</b>  | <b>0</b>     | <b>6</b> |
|        | HiSSE_cid2_null   | TRUE          | equal             | equal               | equal            | -59798.55173        | 119605.1035        | 2.59e-284 | 1305.9616    | 4        |

Notes:

Climatic tropicality is Köppen-Geiger climatic tropics definition, see ref.<sup>5</sup>; the best model based on  $\Delta$ AIC and Akaike weights (AW) denoted in bold; np is the number of parameters.

**Supplementary Table 5.** Summary table for sensitivity test of uneven occurrence data between tropical and non-tropical species.

| Order           | Global tip rate | Treatment | Geo                |                      |                          |         | Küp                |                      |                          |         | Mean annual temperature |                          |         |
|-----------------|-----------------|-----------|--------------------|----------------------|--------------------------|---------|--------------------|----------------------|--------------------------|---------|-------------------------|--------------------------|---------|
|                 |                 |           | Tip rate treatment | Trop. rate treatment | Non-trop. rate treatment | P-value | Tip rate treatment | Trop. rate treatment | Non-trop. rate treatment | P-value | Tip rate treatment      | Estimated rate treatment | P-value |
|                 |                 |           |                    |                      |                          |         |                    |                      |                          |         |                         |                          |         |
| Brassicales     | 0.72641274      | 10% drop  | 0.732314662        | 0.650842538          | 0.642640425              | 0.5     | 0.727359636        | 0.168256755          | 0.646386042              | 0.108   | 0.724216301             | -0.386760116             | 0.022   |
|                 | 0.72641274      | 30% drop  | 0.724456443        | 0.650842538          | 0.642349984              | 0.507   | 0.718995948        | 0.168256755          | 0.650891457              | 0.111   | 0.707690399             | -0.412434693             | 0.021   |
|                 | 0.72641274      | 50% drop  | 0.737270109        | 0.650842538          | 0.646380123              | 0.417   | 0.704248942        | 0.168256755          | 0.651015942              | 0.118   | 0.696403331             | -0.422874126             | 0.035   |
| Celastrales     | 0.608173462     | 10% drop  | 0.611404025        | 0.483998274          | 0.876632652              | 0.751   | 0.605998855        | 0.483335806          | 0.876691195              | 0.675   | 0.607320929             | -0.092800598             | 0.683   |
|                 | 0.608173462     | 30% drop  | 0.612951899        | 0.483998274          | 0.876632652              | 0.729   | 0.605741179        | 0.483335806          | 0.876860646              | 0.737   | 0.611128206             | -0.113006555             | 0.704   |
|                 | 0.608173462     | 50% drop  | 0.612017916        | 0.483998274          | 0.876834127              | 0.732   | 0.598439862        | 0.483335806          | 0.876722298              | 0.704   | 0.579176856             | -0.081432842             | 0.741   |
| Crossosomatales | 0.222794402     | 10% drop  | 0.224233923        | 0.237267586          | 0.241803424              | 0.961   | 0.22236251         | 0.241803424          | 0.241803424              | 0.978   | 0.222401849             | -0.060476582             | 0.983   |
|                 | 0.222794402     | 30% drop  | 0.223042144        | 0.237267586          | 0.241803424              | 0.957   | 0.2249342          | 0.241803424          | 0.24002512               | 0.986   | 0.223126601             | -0.026265415             | 0.972   |
|                 | 0.222794402     | 50% drop  | 0.221430586        | 0.237267586          | 0.241803424              | 0.944   | 0.226414803        | 0.241803424          | 0.241803424              | 1       | 0.214976239             | -0.046933886             | 0.97    |
| Cucurbitales    | 0.416701188     | 10% drop  | 0.409486767        | 0.311867744          | 0.314155437              | 0.44    | 0.402768635        | 0.311340984          | 0.315850664              | 0.237   | 0.403826539             | -0.057485089             | 0.626   |
|                 | 0.416701188     | 30% drop  | 0.409430832        | 0.311867744          | 0.340292206              | 0.328   | 0.38884209         | 0.311340984          | 0.314114973              | 0.326   | 0.392884082             | -0.033635149             | 0.751   |
|                 | 0.416701188     | 50% drop  | 0.399434678        | 0.311867744          | 0.315356616              | 0.531   | 0.386238938        | 0.311340984          | 0.313702179              | 0.367   | 0.380795951             | -0.016663618             | 0.778   |
| Fabales         | 1.080860769     | 10% drop  | 1.015500458        | 0.625967934          | 0.93202733               | 0.007   | 0.998728059        | 0.621794559          | 0.826571163              | 0.003   | 0.971364664             | -0.362551051             | 0.003   |
|                 | 1.080860769     | 30% drop  | 0.96893731         | 0.625967934          | 0.923181949              | 0.009   | 0.981515403        | 0.621794559          | 0.85463543               | 0.001   | 0.9413272               | -0.355169456             | 0.008   |
|                 | 1.080860769     | 50% drop  | 0.936971992        | 0.625967934          | 0.932614871              | 0.007   | 0.912550295        | 0.621794559          | 0.818092033              | 0.007   | 0.885509346             | -0.321325059             | 0.016   |
| Fagales         | 1.507840887     | 10% drop  | 1.49245331         | 1.131389349          | 1.681770857              | 0.462   | 1.492212999        | 0.586731873          | 1.682108694              | 0.319   | 1.481802406             | -0.236873972             | 0.27    |
|                 | 1.507840887     | 30% drop  | 1.465473273        | 1.131389349          | 1.68090723               | 0.468   | 1.447034207        | 0.586731873          | 1.615534664              | 0.386   | 1.472792489             | -0.234200923             | 0.294   |
|                 | 1.507840887     | 50% drop  | 1.45265483         | 1.131389349          | 1.682624856              | 0.484   | 1.427948314        | 0.586731873          | 1.681998731              | 0.32    | 1.452724557             | -0.318215098             | 0.184   |
| Geraniales      | 0.644325704     | 10% drop  | 0.644336094        | 0.63747039           | 0.638570184              | 0.944   | 0.644446857        | 0.63747039           | 0.638570184              | 0.948   | 0.644403559             | 0.03903089               | 0.887   |
|                 | 0.644325704     | 30% drop  | 0.644423452        | 0.63747039           | 0.638570184              | 0.935   | 0.644074264        | 0.63747039           | 0.638570184              | 0.94    | 0.644109562             | 0.042366366              | 0.905   |
|                 | 0.644325704     | 50% drop  | 0.644291933        | 0.63747039           | 0.638570184              | 0.916   | 0.645263922        | 0.63747039           | 0.641135541              | 0.947   | 0.645014519             | 0.031682808              | 0.922   |
| Huerteales      | 0.046143577     | 10% drop  | 0.046143577        | 0.055205683          | 0.058821719              | 0.999   | 0.046143577        | 0.055205683          | 0.058821719              | 0.998   | 0.046143577             | -0.006149065             | 0.995   |
|                 | 0.046143577     | 30% drop  | 0.046259997        | 0.055205683          | 0.058821719              | 0.998   | 0.046259997        | 0.055205683          | 0.058821719              | 0.997   | 0.045747171             | -0.002990482             | 0.992   |
|                 | 0.046143577     | 50% drop  | 0.046019479        | 0.055205683          | 0.058821719              | 0.997   | 0.046259997        | 0.055205683          | 0.058821719              | 0.998   | 0.046019479             | -0.013306033             | 0.997   |
| Malpighiales    | 0.718235017     | 10% drop  | 0.709723388        | 0.600144995          | 0.689307945              | 0.156   | 0.706412766        | 0.573621457          | 0.686878969              | 0.09    | 0.69383343              | -0.223696022             | 0.05    |
|                 | 0.718235017     | 30% drop  | 0.701068412        | 0.600144995          | 0.689332659              | 0.146   | 0.693734424        | 0.573621457          | 0.647532577              | 0.102   | 0.675850008             | -0.216259981             | 0.046   |
|                 | 0.718235017     | 50% drop  | 0.671398383        | 0.600144995          | 0.687009885              | 0.194   | 0.655479131        | 0.573621457          | 0.631997606              | 0.115   | 0.664815004             | -0.208079975             | 0.026   |
| Malvales        | 1.212176034     | 10% drop  | 1.206669644        | 1.296044995          | 0.647365874              | 0.829   | 1.199929871        | 0.890325368          | 1.278719633              | 0.62    | 1.194592936             | -0.113333317             | 0.636   |
|                 | 1.212176034     | 30% drop  | 1.220762319        | 1.296044995          | 0.844215262              | 0.838   | 1.190207771        | 0.890325368          | 1.278505089              | 0.594   | 1.178945306             | -0.098069942             | 0.626   |
|                 | 1.212176034     | 50% drop  | 1.226685231        | 1.296044995          | 1.198776448              | 0.836   | 1.176545278        | 0.890325368          | 1.201690365              | 0.645   | 1.162873011             | -0.119402549             | 0.6     |
| Myrtales        | 1.665370759     | 10% drop  | 1.657783562        | 1.612235835          | 1.610601207              | 0.549   | 1.654578388        | 1.600527352          | 1.613507835              | 0.524   | 1.647833219             | -0.296887556             | 0.43    |
|                 | 1.665370759     | 30% drop  | 1.625777035        | 1.612235835          | 1.607675907              | 0.673   | 1.605382704        | 1.600527352          | 1.612967214              | 0.555   | 1.630244389             | -0.290756725             | 0.371   |
|                 | 1.665370759     | 50% drop  | 1.589683611        | 1.612235835          | 1.607675907              | 0.688   | 1.590556935        | 1.600527352          | 1.613775472              | 0.472   | 1.590072831             | -0.281602909             | 0.357   |
| Oxalidales      | 0.859858516     | 10% drop  | 0.859880464        | 0.861276872          | 0.861361485              | 0.995   | 0.859959139        | 0.861639647          | 0.861361485              | 0.996   | 0.859710606             | 0.004122843              | 0.996   |
|                 | 0.859858516     | 30% drop  | 0.86011294         | 0.861276872          | 0.861266884              | 0.997   | 0.859989752        | 0.861639647          | 0.861361485              | 0.996   | 0.860052546             | 0.003210864              | 0.996   |
|                 | 0.859858516     | 50% drop  | 0.860190337        | 0.861276872          | 0.861498014              | 0.998   | 0.860039938        | 0.861639647          | 0.861426653              | 0.996   | 0.860057883             | 0.003449307              | 0.998   |
| Picramniales    | 0.268442543     | 10% drop  | NA                 | NA                   | NA                       | NA      | 0.268442543        | 0.295160271          | 0.31286426               | 0.998   | 0.268442543             | -0.00956969              | 0.998   |

|                     |             |          |             |             |             |       |             |             |             |       |             |              |       |
|---------------------|-------------|----------|-------------|-------------|-------------|-------|-------------|-------------|-------------|-------|-------------|--------------|-------|
|                     | 0.268442543 | 30% drop | NA          | NA          | NA          | NA    | 0.268442543 | 0.295160271 | 0.31286426  | 0.997 | 0.268442543 | -0.001440622 | 0.999 |
|                     | 0.268442543 | 50% drop | NA          | NA          | NA          | NA    | 0.268442543 | 0.295160271 | 0.31286426  | 0.999 | 0.268442543 | -0.002390239 | 0.995 |
| <b>Rosales</b>      | 2.440185793 | 10% drop | 2.441830016 | 2.527825875 | 2.202351755 | 0.628 | 2.435742614 | 0.978685148 | 2.652744986 | 0.425 | 2.443715183 | -0.241345674 | 0.407 |
|                     | 2.440185793 | 30% drop | 2.407056391 | 2.527825875 | 2.184393415 | 0.605 | 2.399303115 | 0.978685148 | 2.504520755 | 0.446 | 2.408773639 | -0.268033214 | 0.373 |
|                     | 2.440185793 | 50% drop | 2.401613833 | 2.527825875 | 2.202245521 | 0.641 | 2.381190308 | 0.978685148 | 2.640462678 | 0.436 | 2.314862167 | -0.240839037 | 0.465 |
|                     | 0.483309111 | 10% drop | 0.479879872 | 0.406638351 | 0.659600511 | 0.337 | 0.47686237  | 0.402615137 | 0.538623754 | 0.272 | 0.473708375 | -0.183462198 | 0.271 |
| <b>Sapindales</b>   | 0.483309111 | 30% drop | 0.475190259 | 0.406638351 | 0.650095736 | 0.329 | 0.469573717 | 0.402615137 | 0.548543371 | 0.255 | 0.464285433 | -0.181490407 | 0.241 |
|                     | 0.483309111 | 50% drop | 0.465985924 | 0.406638351 | 0.658315157 | 0.303 | 0.456238692 | 0.402615137 | 0.476834805 | 0.376 | 0.460413965 | -0.182197669 | 0.203 |
|                     | 0.199413481 | 10% drop | 0.199403457 | 0.206623017 | 0.206623017 | 1     | 0.199403178 | 0.206623017 | 0.206623017 | 1     | 0.199402889 | -8.16E-05    | 1     |
| <b>Zygothylales</b> | 0.199413481 | 30% drop | 0.199401617 | 0.206623017 | 0.206623017 | 1     | 0.199400124 | 0.206623017 | 0.206623017 | 1     | 0.199399276 | 0.000991593  | 1     |
|                     | 0.199413481 | 50% drop | 0.199418784 | 0.206623017 | 0.206623017 | 1     | 0.199394941 | 0.206623017 | 0.206623017 | 1     | 0.199418784 | 0.000531069  | 1     |
|                     | 1.002648186 | 10% drop | 0.96378635  | 0.806720548 | 0.833263177 | 0.993 | 0.96542284  | 0.806720548 | 0.817460629 | 0.978 | 0.980087627 | -0.304400001 | 0.984 |
| <b>Vitales</b>      | 1.002648186 | 30% drop | 0.944648358 | 0.806720548 | 0.8571574   | 0.98  | 0.924748739 | 0.806720548 | 0.813036444 | 0.986 | 0.964588231 | -0.310418161 | 0.981 |
|                     | 1.002648186 | 50% drop | 0.883721763 | 0.806720548 | 0.817460629 | 0.991 | 0.939155599 | 0.806720548 | 0.813036444 | 0.981 | 0.906048859 | -0.235915225 | 0.984 |

#### Notes:

We conducted a series of 10%, 30%, or 50% of non-tropical random taxon dropping treatments for each ordinal subtree; then we reran STRAPP analyses to estimate tip rate for each treatment and corresponding correlation between its rates and temperature traits (mean annual temperature and two binary tropicality datasets). We only reported the two-tailed *p*-values from the STRAPP analyses here (see below), and we didn't do any correction for multiple comparison.

Global tip rate refers to the average of tip rates calculated for the whole ordinal subtree before taxon-dropping

Tip rate treatment refers to averaged tip rates after the 10%, 30%, or 50% treatments as indicated in the table.

Trop. rate treatment and Non-trop. rate treatment refer to tip rates estimated by STRAPP for each of the binary states (Trop. = tropical;

Non-trop. = non-tropical) after each taxon-dropping treatment

Estimated rate treatment means tip rate estimated by STRAPP for the continuous mean annual temperature data after each taxon-dropping treatment

*p*-value is reported from two-tailed tests of U statistic (binary tropicality datasets) and spearman test (mean annual temperature), respectively.

For the binary data, some small clades were monomorphic, preventing tropicality comparisons, hence these are marked “NA”.

**Supplementary Table 6.** Best models selected for 17 rosid orders from time- and temperature-dependent likelihood diversification models in RPANDA.

| <b>Order</b>    | <b>Best-model</b> | <b><math>\lambda-\mu</math></b> | <b>AICc</b> | <b>AW</b> |
|-----------------|-------------------|---------------------------------|-------------|-----------|
| Brassicales     | bcst.dcst.x       | 0.021                           | 8863.469    | 1         |
| Celastrales     | bcst.dcst.x       | 0.016                           | 1501.449    | 1         |
| Crossosomatales | bcst.dcst.x       | 0.002                           | 154.603     | 1         |
| Cucurbitales    | bcst.dcst.x       | 0.023                           | 4429.737    | 1         |
| Fabales         | bcst.dcst.x       | 0.017                           | 27314.173   | 1         |
| Fagales         | bcst.dcst.x       | 0.007                           | 2276.808    | 1         |
| Geraniales      | bcst.dcst.x       | 0.011                           | 1480.488    | 1         |
| Huerteales      | bcst.dcst.x       | 0.016                           | 44.174      | 0.768     |
| Malpighiales    | bcst.dcst.x       | 0.015                           | 20644.211   | 1         |
| Malvales        | bcst.dcst.x       | 0.017                           | 6741.754    | 1         |
| Myrtales        | bcst.dcst.x       | 0.016                           | 6990.441    | 1         |
| Oxalidales      | bcst.dcst.x       | 0.011                           | 1134.595    | 1         |
| Picramniales    | bcst.dcst.x       | -0.007                          | 33.813      | 0.812     |
| Rosales         | bcst.dcst.x       | 0.011                           | 8323.199    | 1         |
| Sapindales      | bcst.dcst.x       | 0.023                           | 7352.161    | 1         |
| Zygophyllales   | bcst.dcst.x       | 0.008                           | 463.538     | 1         |
| Vitales         | bcst.dcst.x       | 0.009                           | 694.697     | 1         |

Notes:

The best models with the smallest AICc and largest Akaike weight (AW) values among 18 time- and temperature-dependent likelihood diversification models (cf. Supplementary Method 5).

“bcst.dcst.x” means temperature ( $x$ ) dependent birth-death model with constant speciation and extinction rates; the first nine models are time-dependent birth-death models, and the rest are temperature-dependent models (see Supplementary Method 5 for details).

AICc: the corrected Akaike Information Criterion (AICc) for the fitted model.

Net diversification rate ( $\lambda-\mu$ ) is calculated by the speciation rate ( $\lambda$ ) minus the absolute value of extinction rate ( $\mu$ ) parameters estimated by the fitted model at present, respectively; unit is Myr<sup>-1</sup>; note that negative value of  $\lambda$  and  $\mu$  estimated by RPANDA arise from the implementation of likelihood optimization and should be interpreted as their absolute values (see author’s discussion at <https://github.com/hmorlon/PANDA/issues/11>).

**Supplementary Table 7.** Summary table of BAMM MCMC chain length, convergence evaluation and sampling fraction of each rosid order.

| Order           | MCMC Generation | Sampling fraction | Effective Size |         |
|-----------------|-----------------|-------------------|----------------|---------|
|                 |                 |                   | N_shifts       | logLik  |
| Brassicales     | 208,316,000     | 0.308             | 1359.32        | 2430.96 |
| Celastrales     | 22,000,000      | 0.187             | 588.06         | 490.94  |
| Cucurbitales    | 20,000,000      | 0.278             | 781.13         | 494.86  |
| Fabales         | 134,198,000     | 0.235             | 600.01         | 230.90  |
| Fagales         | 20,000,000      | 0.237             | 851.79         | 399.77  |
| Malpighiales    | 111,508,000     | 0.18              | 469.09         | 266.18  |
| Malvales        | 80,000,000      | 0.173             | 395.97         | 241.41  |
| Myrtales        | 80,000,000      | 0.088             | 782.36         | 995.11  |
| Oxalidales      | 22,000,000      | 0.087             | 784.08         | 2226.57 |
| Rosales         | 200,000,000     | 0.086             | 2946.91        | 815.99  |
| Sapindales      | 82,000,000      | 0.193             | 2015.80        | 1439.91 |
| Crossosomatales | 2,000,000       | 0.293             | 552.70         | 595.89  |
| Geraniales      | 2,000,000       | 0.315             | 520.72         | 251.23  |
| Huerteales      | 2,000,000       | 0.233             | 901.00         | 901.00  |
| Picramniales    | 2,000,000       | 0.088             | 560.40         | 815.48  |
| Vitaceae        | 2,000,000       | 0.103             | 272.24         | 378.22  |
| Zygophyllales   | 2,000,000       | 0.206             | 901.00         | 770.95  |

Notes:

Sampling fractions were calculated based on the number of species sampled in each major clade recognized as an order (ref.<sup>35</sup>), divided by the total species richness of each clade as summarized using OpenTree (See ref.<sup>30</sup>).

N\_shifts and logLik are two parameters (the number of shifts and log likelihoods) used to assess effective sample sizes (>200) and convergence among chains (see BAMM documentation).

## Supplementary Figure



**Supplementary Fig. 1.** Global species richness distribution pattern for tropical and non-tropical rosid species, calculated from our occurrence record set.













**Supplementary Fig. 2.** Correlation between Bamm net diversification rates in 17 rosoid orders and historical global temperature based on linear and exponential best-fit models. Panels a-q represent the best linear model for each of 17 orders with AIC and  $R^2$  as indicated; similarly, and panels aa-qq represent the best exponential model for 17 orders with AIC and  $R^2$  as indicated; historical global temperature (5-point temperature means) since the Late Cretaceous ( $\sim 113$  Myr) is derived from ref<sup>31</sup>.



**Supplementary Fig. 3.** The age distribution of diversification rate shifts of 17 rosoid orders estimated by BAMM. Panel a: Ridge plots of the age distribution of diversification rate shift for each rosoid order; data from orders Geraniales and Vitales were removed from plotting because only 1 shift was detected in each; no shifts were detected for the orders Crossosomatales, Huerteales, Oxalidales, Picramniales, and Zygophyllales in our BAMM analyses. Panel b: Boxplot shows a summary of overall ages of each diversification shift detected across all 17 orders with time in “Myr” on the y-axis. N=182; Median—solid line in the box, box—interquartile range [25% and 75%], whiskers—5% and 95% intervals. Generally, the times of the overall diversification rate shifts are coincident with an earlier cooling period at the Eocene-Oligocene Glacial Maximum (~34 Myr; Panel a). Also, as shown in Fig. 2 in main text, diversification rates from most rosoid orders show abrupt rate increases from ~15 Myr (around the Middle Miocene Climatic Optimum) to the present. Source data are provided in Source Data file.

## Supplementary References

1. Chamberlain, S. & Boettiger, C. R. Python, and Ruby clients for GBIF species occurrence data. *PeerJ. PrePr.* **5**, e3304v1 (2017).
2. Chamberlain, S. *et al.* rgbif: Interface to the Global Biodiversity Information Facility API. R package version 1.3.0. <https://CRAN.R-project.org/package=rgbif> (2019).
3. Michonneau, F. & Collins, M. ridigbio: Interface to the iDigBio Data API. R package version 0.3.5. <https://CRAN.R-project.org/package=ridigbio> (2017).
4. Folk, R. A. *et al.* Rates of niche and phenotype evolution lag behind diversification in a temperate radiation. *Proc. Natl. Acad. Sci. U. S. A.* **116**, 10874–10882 (2019).
5. Owens, H. L. *et al.* The latitudinal diversity gradient in New World swallowtail butterflies is caused by contrasting patterns of out-of-and into-the-tropics dispersal. *Glob. Ecol. Biogeogr.* **26**, 1447–1458 (2017).
6. Rabosky, D. L. Automatic Detection of Key Innovations, Rate Shifts, and Diversity-Dependence on Phylogenetic Trees. *PLoS ONE* **9**, e89543 (2014).
7. Rabosky, D. L. *et al.* BAMMtools: an R package for the analysis of evolutionary dynamics on phylogenetic trees. *Methods Ecol. Evol.* **5**, 701–707 (2014).
8. Plummer, M., Best, N., Cowles, K. & Vines, K. CODA: convergence diagnosis and output analysis for MCMC. *R news* **6**, 7–11 (2006).
9. Jetz, W., Thomas, G. H., Joy, J. B., Hartmann, K. & Mooers, A. O. The global diversity of birds in space and time. *Nature* **491**, 444–448 (2012).
10. Harvey, M. G. *et al.* Population differentiation versus speciation rates. *Proc. Natl. Acad. Sci. U. S. A.* **114**, 6328–6333 (2017).
11. Rabosky, D. L. *et al.* An inverse latitudinal gradient in speciation rate for marine fishes. *Nature* **559**, 392–395 (2018).
12. Sun, M. *et al.* Estimating rates and patterns of diversification with incomplete sampling: A case study in the rosids. *Am. J. Bot.* (2020; In press).
13. Harvey, M. G. & Rabosky, D. L. Continuous traits and speciation rates: Alternatives to state-dependent diversification models. *Methods Ecol. Evol.* **9**, 984–993 (2017).
14. Rabosky, D. L. & Goldberg, E. E. FiSSE: A simple nonparametric test for the effects of a binary character on lineage diversification rates. *Evolution* **71**, 1432–1442 (2017).

15. Barnes, R. dggridR: Discrete Global Grids for R. R package version 0.1.12. <https://github.com/r-barnes/dggridR/> (2017).
16. May, M. R. & Moore, B. R. How well can we detect lineage-specific diversification-rate shifts? A simulation study of sequential AIC methods. *Syst. Biol.* **65**, 1076–1084 (2016).
17. Moore, B. R., Höhna, S., May, M. R., Rannala, B. & Huelsenbeck, J. P. Critically evaluating the theory and performance of Bayesian analysis of macroevolutionary mixtures. *Proc. Natl. Acad. Sci. U.S.A.* **113**, 9569–9574 (2016).
18. Meyer, A. & Wiens, J. J. Estimating diversification rates for higher taxa: BAMM can give problematic estimate of rates and rate shifts. *Evolution* **72**, 39–53 (2017).
19. Meyer, A., Roman-Palacios, C. & Wiens, J. J. BAMM gives misleading rate estimates in simulated and empirical datasets. *Evolution* **72**, 2257–2266 (2018).
20. Rabosky, D. L., Mitchell, J. S & Chang, J. Is BAMM Flawed? Theoretical and Practical Concerns in the Analysis of Multi-Rate Diversification Models. *Syst. Biol.* **66**, 477–498 (2017).
21. Rabosky, D. L. BAMM at the court of false equivalency: a response to Meyer and Wiens. *Evolution* **72**, 2246–2256 (2018a).
22. Rabosky, D. L. Phylogenies and diversification rates: variance cannot be ignored. *Syst. Biol.* **68**, 538–550 (2018b).
23. Maddison, W. P., Midford, P. E., & Otto, S. P. Estimating a binary character's effect on speciation and extinction. *Syst. Biol.* **56**, 701–710 (2007).
24. Beaulieu, J. M. & O'Meara, B. C. Detecting Hidden Diversification Shifts in Models of Trait-Dependent Speciation and Extinction, *Syst. Biol.* **65**, 583–601 (2016).
25. Wagenmakers, E. J. & Farrell, S. AIC model selection using Akaike weights. *Psychon. Bull. Rev.* **11**, 192–196 (2004).
26. Kreft, H, & Jetz, W. Global patterns and determinants of vascular plant diversity. *Proc. Natl. Acad. Sci. U. S. A.* **104**, 5925–5930 (2007).
27. Rabosky, D. L. & Huang, H. A robust semi-parametric test for detecting traitdependent diversification. *Syst. Biol.* **65**, 181–193 (2016).
28. Morlon, H., Lewitus, E., Condamine, F. L., Manceau, M., Clavel, J. & Drury, J. RPANDA: an R package for macroevolutionary analyses on phylogenetic trees. *Methods Ecol. Evol.* **7**, 589–597 (2016).

29. Morlon, H. Phylogenetic approaches for studying diversification. *Ecol. Lett.* **17**, 508–525 (2014).
30. Sun, M. *et al.* Exploring the phylogeny of rosids with a five-locus supermatrix from GenBank. Preprint at <https://www.biorxiv.org/content/10.1101/694950v1> (2019).
31. Cramer, B. S., Toggweiler, J. R., Wright, J. D., Katz, M. E. & Miller, K. G. Ocean overturning since the Late Cretaceous: Inferences from a new benthic foraminiferal isotope compilation. *Paleoceanography* **24**, PA4216 (2009).
32. Condamine, F. L., Rolland, J. & Morlon, H. Macroevolutionary perspectives to environmental change. *Ecol. Lett.* **16**, 72–85 (2013).
33. Akaike, H. A new look at the statistical model identification. *IEEE Transactions on Automatic Control* **19**, 716–723 (1974).
34. Hochberg, Y. A sharper Bonferroni procedure for multiple tests of significance. *Biometrika* **75**, 800–803 (1988).
35. APG IV. An update of the Angiosperm Phylogeny Group classification for the orders and families of flowering plants: APG IV. *Bot. J. Linn. Soc.* **181**, 1–20 (2016).
